# Supplementary material for: Metabolic profiling of fatty liver in young and middle‐aged adults: Cross‐sectional and prospective analyses of the Young Finns Study
Source: PubMed Central journal article supplement — Hepatology. 2016 Dec 24;65(2):491–500. doi: 10.1002/hep.28899 (PMC5299457; doi:10.1002/hep.28899), 2016-12-24
Supplement: HEP-65-491-s001.pdf [file HEP-65-491-s001.pdf]

**SUPPLEMENTARY TABLE 1:** Mean (SD) concentrations of metabolic biomarker measures from serum samples collected in 2011 in absolute concentration units, and their correlations with the categorical fatty liver score.

|                                               | Normal liver<br>(n=1,630) |       | Fatty liver<br>(n=372) |       | Spearman<br>correlation <sup>1</sup> |
|-----------------------------------------------|---------------------------|-------|------------------------|-------|--------------------------------------|
|                                               | Mean                      | SD    | Mean                   | SD    | r                                    |
| <b>LIPOPROTEIN PARTICLES</b>                  |                           |       |                        |       |                                      |
| <i>VLDL</i>                                   |                           |       |                        |       |                                      |
| Total VLDL particle concentration (pmol/L)    | 82                        | 36    | 117                    | 46    | 0.300*                               |
| Extremely large VLDL particles (pmol/L)       | 0.07                      | 0.15  | 0.20                   | 0.27  | 0.298*                               |
| Very large VLDL particles (pmol/L)            | 0.37                      | 0.85  | 1.23                   | 1.50  | 0.327*                               |
| Large VLDL particles (pmol/L)                 | 3.5                       | 4.8   | 8.5                    | 7.6   | 0.316*                               |
| Medium VLDL particles (pmol/L)                | 14.5                      | 11.6  | 26.7                   | 17.0  | 0.310*                               |
| Small VLDL particles (pmol/L)                 | 26.9                      | 12.8  | 39.3                   | 15.8  | 0.306*                               |
| Very small VLDL particles (pmol/L)            | 36.1                      | 10.3  | 40.4                   | 11.8  | 0.162*                               |
| <i>IDL and LDL</i>                            |                           |       |                        |       |                                      |
| Total IDL+LDL particle concentration (pmol/L) | 557                       | 134   | 618                    | 159   | 0.175*                               |
| IDL particles (pmol/L)                        | 99                        | 24    | 105                    | 29    | 0.114*                               |
| Large LDL particles (pmol/L)                  | 168                       | 40    | 183                    | 48    | 0.154*                               |
| Medium LDL particles (pmol/L)                 | 137                       | 35    | 154                    | 40    | 0.189*                               |
| Small LDL particles (pmol/L)                  | 153                       | 39    | 175                    | 47    | 0.204*                               |
| <i>HDL</i>                                    |                           |       |                        |       |                                      |
| Total HDL particle concentration (nmol/L)     | 8.1                       | 1.1   | 7.9                    | 1.1   | -0.114*                              |
| Very large HDL particles (nmol/L)             | 0.34                      | 0.21  | 0.18                   | 0.16  | -0.287*                              |
| Large HDL particles (nmol/L)                  | 1.16                      | 0.50  | 0.77                   | 0.45  | -0.300*                              |
| Medium HDL particles (nmol/L)                 | 1.98                      | 0.37  | 1.99                   | 0.40  | -0.040                               |
| Small HDL particles (nmol/L)                  | 4.62                      | 0.45  | 4.94                   | 0.46  | 0.218*                               |
| <i>PARTICLE SIZE</i>                          |                           |       |                        |       |                                      |
| VLDL particle size (nm)                       | 36.1                      | 1.4   | 37.7                   | 1.8   | 0.301*                               |
| LDL particle size (nm)                        | 23.6                      | 0.2   | 23.5                   | 0.2   | -0.167*                              |
| HDL particle size (nm)                        | 9.9                       | 0.3   | 9.7                    | 0.2   | -0.319*                              |
| <b>TRIGLYCERIDES</b>                          |                           |       |                        |       |                                      |
| Serum triglycerides (mmol/L)                  | 1.24                      | 0.67  | 1.96                   | 1.00  | 0.318*                               |
| Extremely large VLDL triglycerides (mmol/L)   | 0.009                     | 0.023 | 0.030                  | 0.044 | 0.342*                               |
| VLDL triglycerides (mmol/L)                   | 0.75                      | 0.60  | 1.39                   | 0.90  | 0.319*                               |
| IDL triglycerides (mmol/L)                    | 0.135                     | 0.037 | 0.153                  | 0.044 | 0.178*                               |
| LDL triglycerides (mmol/L)                    | 0.201                     | 0.075 | 0.246                  | 0.117 | 0.199*                               |
| HDL triglycerides (mmol/L)                    | 0.152                     | 0.038 | 0.169                  | 0.043 | 0.143*                               |
| <b>CHOLESTEROL AND APOLIPOPROTEINS</b>        |                           |       |                        |       |                                      |
| Serum cholesterol (mmol/L)                    | 5.03                      | 0.93  | 5.26                   | 1.11  | 0.106*                               |
| VLDL cholesterol (mmol/L)                     | 0.64                      | 0.27  | 0.86                   | 0.33  | 0.268*                               |
| Non-HDL cholesterol (mmol/L)                  | 3.37                      | 0.91  | 3.84                   | 1.05  | 0.199*                               |
| IDL cholesterol (mmol/L)                      | 0.75                      | 0.18  | 0.78                   | 0.22  | 0.091*                               |
| LDL cholesterol (mmol/L)                      | 1.98                      | 0.56  | 2.20                   | 0.65  | 0.162*                               |
| HDL cholesterol (mmol/L)                      | 1.65                      | 0.38  | 1.41                   | 0.37  | -0.248*                              |

|                                                  |       |       |       |       |         |
|--------------------------------------------------|-------|-------|-------|-------|---------|
| HDL <sub>2</sub> cholesterol (mmol/L)            | 1.13  | 0.38  | 0.88  | 0.37  | -0.270* |
| HDL <sub>3</sub> cholesterol (mmol/L)            | 0.53  | 0.04  | 0.54  | 0.06  | 0.071   |
| Apolipoprotein B (g/L)                           | 0.93  | 0.23  | 1.12  | 0.27  | 0.270*  |
| Apolipoprotein A-I (g/L)                         | 1.71  | 0.23  | 1.63  | 0.24  | -0.129* |
| Apo B/Apo A-I                                    | 0.55  | 0.15  | 0.70  | 0.16  | 0.311*  |
| <b>FATTY ACIDS</b>                               |       |       |       |       |         |
| Total FA concentration (mmol/L)                  | 10.9  | 2.5   | 13.2  | 3.4   | 0.242*  |
| PUFA (%), relative to total fatty acids          | 38.2  | 3.8   | 33.8  | 4.5   | -0.266* |
| n-3 (%), relative to total fatty acids           | 3.86  | 1.01  | 3.55  | 0.85  | -0.130* |
| DHA (%), relative to total fatty acids           | 1.61  | 0.54  | 1.38  | 0.46  | -0.135* |
| n-6 (%), relative to total fatty acids           | 34.4  | 3.7   | 30.2  | 4.2   | -0.251* |
| Linoleic acid (%), relative to total fatty acids | 29.0  | 3.7   | 25.0  | 3.8   | -0.265* |
| MUFA (%), relative to total fatty acids          | 28.0  | 3.4   | 31.1  | 3.9   | 0.257*  |
| SFA (%), relative to total fatty acids           | 33.8  | 2.2   | 35.1  | 2.4   | 0.113*  |
| n-6 /n-3                                         | 9.47  | 2.55  | 8.91  | 2.24  | -0.022  |
| PUFA/SFA                                         | 1.14  | 0.16  | 0.97  | 0.17  | -0.237* |
| Double bonds per fatty acid                      | 1.27  | 0.08  | 1.19  | 0.09  | -0.209* |
| <b>AMINO ACIDS</b>                               |       |       |       |       |         |
| Isoleucine (mmol/L)                              | 0.051 | 0.015 | 0.069 | 0.019 | 0.351*  |
| Leucine (mmol/L)                                 | 0.080 | 0.016 | 0.098 | 0.019 | 0.334*  |
| Valine (mmol/L)                                  | 0.199 | 0.038 | 0.230 | 0.044 | 0.270*  |
| Phenylalanine (mmol/L)                           | 0.074 | 0.010 | 0.084 | 0.011 | 0.305*  |
| Tyrosine (mmol/L)                                | 0.050 | 0.010 | 0.059 | 0.012 | 0.281*  |
| Alanine (mmol/L)                                 | 0.399 | 0.059 | 0.441 | 0.064 | 0.239*  |
| Glutamine (mmol/L)                               | 0.595 | 0.068 | 0.581 | 0.078 | -0.069  |
| Histidine (mmol/L)                               | 0.065 | 0.009 | 0.066 | 0.009 | 0.071   |
| Glycine (mmol/L)                                 | 0.296 | 0.063 | 0.276 | 0.053 | -0.086* |
| <b>GLYCOLYSIS-RELATED METABOLITES</b>            |       |       |       |       |         |
| Glycerol (mmol/L)                                | 0.098 | 0.037 | 0.114 | 0.039 | 0.138*  |
| Glucose (mmol/L)                                 | 4.64  | 0.67  | 5.12  | 1.22  | 0.231*  |
| Lactate (mmol/L)                                 | 1.42  | 0.35  | 1.62  | 0.44  | 0.140*  |
| Pyruvate (mmol/L)                                | 0.077 | 0.022 | 0.091 | 0.027 | 0.196*  |
| <b>KETONE BODIES</b>                             |       |       |       |       |         |
| Acetoacetate (mmol/L)                            | 0.058 | 0.042 | 0.057 | 0.047 | -0.013  |
| 3-hydroxybuturate (mmol/L)                       | 0.10  | 0.11  | 0.10  | 0.14  | -0.024  |
| <b>MISCELLANEOUS</b>                             |       |       |       |       |         |
| Citrate (mmol/L)                                 | 0.104 | 0.018 | 0.104 | 0.017 | -0.001  |
| Acetate (mmol/L)                                 | 0.046 | 0.015 | 0.042 | 0.010 | -0.103* |
| Glycoprotein acetyls (mmol/L)                    | 1.52  | 0.21  | 1.72  | 0.26  | 0.284*  |
| C-reactive protein (mg/L) <sup>2</sup>           | 1.70  | 2.70  | 3.15  | 4.17  | 0.253*  |
| Creatinine (mmol/L)                              | 0.063 | 0.013 | 0.064 | 0.012 | 0.070   |
| Albumin (signal area)                            | 0.105 | 0.009 | 0.105 | 0.009 | 0.040   |
| Alanine aminotransferase (U/L) <sup>2</sup>      | 14.8  | 9.7   | 31.7  | 36.4  | 0.336*  |
| Gamma-glutamyl transferase (U/L) <sup>2</sup>    | 27.6  | 27.7  | 62.5  | 70.8  | 0.356*  |
| HOMA-insulin resistance index <sup>2</sup>       | 1.9   | 4.0   | 9.7   | 87.5  | 0.389*  |

The number of participants with both metabolite data and fatty liver measurements was n=2,002. Since some metabolic measures were not determined in a small number of study participants, for some measures, the concentrations are reported for n=1,939–2,002.

Abbreviations: DHA, docosahexaenoic acid; HDL, high-density lipoprotein; HOMA, homeostatic model; IDL, intermediate-density lipoprotein; LDL, low-density lipoprotein; MUFA, monounsaturated fatty acid; PUFA, polyunsaturated fatty acid; SFA, saturated fatty acid; VLDL, very-low-density lipoprotein.

<sup>1</sup>Spearman correlation coefficients between absolute metabolite concentrations and the categorical fatty liver score (n=1,859–1,919). The fatty liver score was calculated by summarizing the values of the five widely accepted criteria for fatty liver: 1) the liver-to-kidney contrast (no=0 or clear contrast=1), 2) parenchymal brightness (normal=0, mild=1, intermediate=2 or severe brightness=3), 3) deep beam attenuation (clear=0, attenuated=1 or no visible=2 line of diaphragm) 4) bright vessel walls (normal=0, partly visible=1 or no visible=2 vessel walls) and 5) visibility of the neck of the gallbladder (normal=0, partly visible=1, not visible=2). The final score included in values ranging from 0 to 9.

<sup>2</sup>Measure not quantified by the NMR metabolomics platform.

\* Statistical significance at  $P < 0.0007$ .

**SUPPLEMENTARY TABLE 2:** Comparison of BMI and waist circumference as anthropometric covariates in the cross-sectional (metabolites in 2011 vs. fatty liver status in 2011) and prospective (metabolites in 2001 vs. fatty liver status in 2011) associations. Odds ratios and their 95% confidence intervals are per 1-SD increment in the metabolic measures, and shown with adjustment for sex, age, BMI or waist circumference, alcohol intake, leisure-time physical activity and smoking.

|                                      | CROSS-SECTIONAL ASSOCIATIONS (2011) |                   |      |       |                    |                   |      |       | PROSPECTIVE ASSOCIATIONS (2001->2011) |                   |      |       |                    |                   |      |       |
|--------------------------------------|-------------------------------------|-------------------|------|-------|--------------------|-------------------|------|-------|---------------------------------------|-------------------|------|-------|--------------------|-------------------|------|-------|
|                                      | BMI as covariate                    |                   |      |       | WAIST as covariate |                   |      |       | BMI as covariate                      |                   |      |       | WAIST as covariate |                   |      |       |
|                                      | OR                                  | 95%CI<br>Low High |      | P     | OR                 | 95%CI<br>Low High |      | P     | OR                                    | 95%CI<br>Low High |      | P     | OR                 | 95%CI<br>Low High |      | P     |
| <b>LIPOPROTEIN PARTICLES</b>         |                                     |                   |      |       |                    |                   |      |       |                                       |                   |      |       |                    |                   |      |       |
| <b>VLDL</b>                          |                                     |                   |      |       |                    |                   |      |       |                                       |                   |      |       |                    |                   |      |       |
| Total VLDL particle concentration    | 1.52                                | 1.30              | 1.78 | 2E-7  | 1.54               | 1.32              | 1.81 | 9E-8  | 1.38                                  | 1.16              | 1.64 | 3E-4  | 1.45               | 1.22              | 1.72 | 2E-5  |
| Extremely large VLDL particles       | 1.83                                | 1.50              | 2.22 | 1E-9  | 1.82               | 1.50              | 2.22 | 2E-9  | 1.42                                  | 1.19              | 1.69 | 8E-5  | 1.46               | 1.23              | 1.74 | 2E-5  |
| Very large VLDL particles            | 1.67                                | 1.35              | 2.08 | 4E-6  | 1.68               | 1.35              | 2.09 | 3E-6  | 1.51                                  | 1.20              | 1.89 | 3E-4  | 1.60               | 1.28              | 2.01 | 4E-5  |
| Large VLDL particles                 | 1.93                                | 1.51              | 2.46 | 2E-7  | 1.98               | 1.54              | 2.54 | 8E-8  | 1.41                                  | 1.13              | 1.75 | 0.002 | 1.51               | 1.21              | 1.89 | 3E-4  |
| Medium VLDL particles                | 1.70                                | 1.45              | 1.99 | 4E-11 | 1.74               | 1.48              | 2.03 | 8E-12 | 1.45                                  | 1.21              | 1.72 | 3E-5  | 1.53               | 1.29              | 1.82 | 1E-6  |
| Small VLDL particles                 | 1.53                                | 1.29              | 1.81 | 7E-7  | 1.55               | 1.31              | 1.84 | 3E-7  | 1.39                                  | 1.16              | 1.67 | 4E-4  | 1.48               | 1.23              | 1.77 | 2E-5  |
| Very small VLDL particles            | 1.05                                | 0.92              | 1.20 | 0.47  | 1.06               | 0.93              | 1.21 | 0.41  | 1.08                                  | 0.93              | 1.25 | 0.29  | 1.10               | 0.95              | 1.28 | 0.19  |
| <b>IDL and LDL</b>                   |                                     |                   |      |       |                    |                   |      |       |                                       |                   |      |       |                    |                   |      |       |
| Total IDL+LDL particle concentration | 1.13                                | 0.99              | 1.28 | 0.07  | 1.14               | 1.00              | 1.30 | 0.05  | 1.13                                  | 0.97              | 1.31 | 0.12  | 1.16               | 1.00              | 1.35 | 0.05  |
| IDL particles                        | 1.01                                | 0.89              | 1.14 | 0.92  | 1.01               | 0.89              | 1.15 | 0.82  | 1.04                                  | 0.89              | 1.20 | 0.65  | 1.05               | 0.91              | 1.22 | 0.51  |
| Large LDL particles                  | 1.08                                | 0.95              | 1.22 | 0.27  | 1.09               | 0.96              | 1.24 | 0.19  | 1.08                                  | 0.93              | 1.25 | 0.34  | 1.10               | 0.95              | 1.28 | 0.20  |
| Medium LDL particles                 | 1.15                                | 1.01              | 1.31 | 0.03  | 1.17               | 1.02              | 1.33 | 0.02  | 1.14                                  | 0.98              | 1.32 | 0.10  | 1.17               | 1.01              | 1.36 | 0.04  |
| Small LDL particles                  | 1.22                                | 1.07              | 1.40 | 0.002 | 1.24               | 1.09              | 1.41 | 0.001 | 1.23                                  | 1.06              | 1.43 | 0.007 | 1.28               | 1.10              | 1.48 | 0.001 |
| <b>HDL</b>                           |                                     |                   |      |       |                    |                   |      |       |                                       |                   |      |       |                    |                   |      |       |
| Total HDL particle concentration     | 1.05                                | 0.91              | 1.21 | 0.51  | 1.10               | 0.95              | 1.27 | 0.18  | 1.05                                  | 0.89              | 1.24 | 0.54  | 1.04               | 0.88              | 1.22 | 0.64  |
| Very large HDL particles             | 0.75                                | 0.66              | 0.85 | 6E-6  | 0.74               | 0.65              | 0.84 | 3E-6  | 0.92                                  | 0.80              | 1.06 | 0.26  | 0.91               | 0.80              | 1.05 | 0.19  |
| Large HDL particles                  | 0.65                                | 0.54              | 0.79 | 8E-6  | 0.67               | 0.55              | 0.80 | 3E-5  | 0.67                                  | 0.54              | 0.83 | 3E-4  | 0.64               | 0.51              | 0.79 | 3E-5  |
| Medium HDL particles                 | 1.18                                | 1.03              | 1.35 | 0.02  | 1.23               | 1.07              | 1.41 | 0.003 | 1.13                                  | 0.97              | 1.33 | 0.13  | 1.12               | 0.95              | 1.31 | 0.17  |
| Small HDL particles                  | 1.50                                | 1.30              | 1.73 | 2E-8  | 1.57               | 1.37              | 1.81 | 3E-10 | 1.34                                  | 1.15              | 1.56 | 1E-04 | 1.37               | 1.18              | 1.58 | 3E-5  |
| <b>PARTICLE SIZE</b>                 |                                     |                   |      |       |                    |                   |      |       |                                       |                   |      |       |                    |                   |      |       |
| VLDL particle size                   | 1.74                                | 1.51              | 2.00 | 4E-15 | 1.77               | 1.54              | 2.03 | 5E-16 | 1.58                                  | 1.35              | 1.84 | 1E-08 | 1.65               | 1.42              | 1.92 | 1E-10 |
| LDL particle size                    | 0.72                                | 0.63              | 0.82 | 1E-6  | 0.71               | 0.62              | 0.81 | 3E-7  | 0.71                                  | 0.60              | 0.83 | 2E-05 | 0.68               | 0.58              | 0.79 | 1E-6  |

|                                                  |      |      |      |       |      |      |      |        |      |      |      |       |      |      |      |       |
|--------------------------------------------------|------|------|------|-------|------|------|------|--------|------|------|------|-------|------|------|------|-------|
| HDL particle size                                | 0.57 | 0.47 | 0.69 | 8E-9  | 0.57 | 0.47 | 0.69 | 8E-9   | 0.67 | 0.55 | 0.82 | 1E-04 | 0.64 | 0.52 | 0.78 | 1E-5  |
| <b>TRIGLYCERIDES</b>                             |      |      |      |       |      |      |      |        |      |      |      |       |      |      |      |       |
| Serum triglycerides                              | 1.69 | 1.46 | 1.97 | 7E-12 | 1.72 | 1.48 | 2.00 | 2E-12  | 1.51 | 1.28 | 1.79 | 1E-6  | 1.60 | 1.35 | 1.89 | 4E-8  |
| Extremely large VLDL triglycerides               | 2.28 | 1.72 | 3.02 | 1E-8  | 2.23 | 1.68 | 2.96 | 3E-8   | 1.68 | 1.36 | 2.07 | 2E-6  | 1.76 | 1.42 | 2.18 | 2E-7  |
| VLDL triglycerides                               | 1.78 | 1.51 | 2.10 | 5E-12 | 1.81 | 1.54 | 2.14 | 1E-12  | 1.55 | 1.29 | 1.85 | 2E-6  | 1.64 | 1.37 | 1.96 | 5E-8  |
| IDL triglycerides                                | 1.15 | 1.01 | 1.31 | 0.03  | 1.16 | 1.02 | 1.32 | 0.03   | 1.09 | 0.95 | 1.27 | 0.23  | 1.11 | 0.96 | 1.28 | 0.17  |
| LDL triglycerides                                | 1.24 | 1.08 | 1.43 | 0.003 | 1.23 | 1.06 | 1.41 | 0.005  | 1.31 | 1.11 | 1.55 | 0.002 | 1.36 | 1.15 | 1.61 | 4E-4  |
| HDL triglycerides                                | 1.22 | 1.07 | 1.38 | 0.002 | 1.24 | 1.10 | 1.41 | 0.0007 | 1.04 | 0.90 | 1.20 | 0.61  | 1.04 | 0.90 | 1.20 | 0.58  |
| <b>CHOLESTEROL AND APOLIPOPROTEINS</b>           |      |      |      |       |      |      |      |        |      |      |      |       |      |      |      |       |
| Serum cholesterol                                | 1.06 | 0.93 | 1.20 | 0.41  | 1.08 | 0.95 | 1.23 | 0.24   | 1.05 | 0.90 | 1.22 | 0.55  | 1.07 | 0.92 | 1.24 | 0.37  |
| VLDL cholesterol                                 | 1.33 | 1.14 | 1.56 | 3E-4  | 1.35 | 1.16 | 1.58 | 2E-4   | 1.25 | 1.06 | 1.49 | 0.009 | 1.31 | 1.11 | 1.56 | 0.002 |
| Non-HDL cholesterol                              | 1.10 | 0.95 | 1.27 | 0.19  | 1.12 | 0.97 | 1.29 | 0.13   | 1.07 | 0.91 | 1.25 | 0.43  | 1.11 | 0.94 | 1.30 | 0.21  |
| IDL cholesterol                                  | 0.97 | 0.86 | 1.10 | 0.68  | 0.98 | 0.87 | 1.12 | 0.80   | 1.00 | 0.86 | 1.16 | 0.98  | 1.02 | 0.88 | 1.18 | 0.82  |
| LDL cholesterol                                  | 1.08 | 0.95 | 1.23 | 0.23  | 1.10 | 0.96 | 1.25 | 0.17   | 1.07 | 0.92 | 1.24 | 0.39  | 1.10 | 0.95 | 1.28 | 0.21  |
| HDL cholesterol                                  | 0.74 | 0.64 | 0.87 | 2E-4  | 0.76 | 0.65 | 0.89 | 0.0007 | 0.82 | 0.69 | 0.98 | 0.03  | 0.80 | 0.68 | 0.96 | 0.01  |
| HDL <sub>2</sub> cholesterol                     | 0.70 | 0.60 | 0.82 | 9E-6  | 0.72 | 0.61 | 0.84 | 4E-5   | 0.76 | 0.64 | 0.92 | 0.004 | 0.74 | 0.62 | 0.89 | 0.001 |
| HDL <sub>3</sub> cholesterol                     | 1.05 | 0.92 | 1.19 | 0.49  | 1.07 | 0.94 | 1.22 | 0.28   | 1.22 | 1.06 | 1.41 | 0.006 | 1.27 | 1.10 | 1.46 | 0.001 |
| Apolipoprotein B                                 | 1.38 | 1.19 | 1.61 | 2E-5  | 1.40 | 1.20 | 1.62 | 2E-5   | 1.29 | 1.09 | 1.52 | 0.003 | 1.35 | 1.15 | 1.60 | 3E-4  |
| Apolipoprotein A-I                               | 0.90 | 0.78 | 1.04 | 0.15  | 0.93 | 0.81 | 1.07 | 0.33   | 0.99 | 0.84 | 1.16 | 0.88  | 0.99 | 0.85 | 1.16 | 0.93  |
| Apo B/Apo A-I                                    | 1.56 | 1.32 | 1.85 | 2E-7  | 1.54 | 1.30 | 1.83 | 4E-7   | 1.32 | 1.10 | 1.59 | 0.003 | 1.39 | 1.16 | 1.67 | 4E-4  |
| <b>FATTY ACIDS</b>                               |      |      |      |       |      |      |      |        |      |      |      |       |      |      |      |       |
| Total FA concentration                           | 1.56 | 1.36 | 1.79 | 3E-10 | 1.58 | 1.38 | 1.82 | 7E-11  | 1.38 | 1.19 | 1.60 | 3E-05 | 1.43 | 1.24 | 1.66 | 2E-6  |
| PUFA (%), relative to total fatty acids          | 0.45 | 0.39 | 0.53 | 1E-24 | 0.45 | 0.39 | 0.52 | 8E-25  | 0.55 | 0.47 | 0.64 | 2E-14 | 0.53 | 0.46 | 0.62 | 4E-16 |
| n-3 (%), relative to total fatty acids           | 0.82 | 0.71 | 0.95 | 0.007 | 0.83 | 0.72 | 0.96 | 0.01   | 0.85 | 0.73 | 0.99 | 0.04  | 0.85 | 0.73 | 0.99 | 0.04  |
| DHA (%), relative to total fatty acids           | 0.78 | 0.68 | 0.90 | 6E-4  | 0.78 | 0.68 | 0.90 | 0.0007 | 0.82 | 0.71 | 0.96 | 0.01  | 0.81 | 0.70 | 0.95 | 0.008 |
| n-6 (%), relative to total fatty acids           | 0.47 | 0.40 | 0.54 | 2E-23 | 0.46 | 0.40 | 0.54 | 7E-24  | 0.56 | 0.48 | 0.66 | 3E-13 | 0.55 | 0.47 | 0.64 | 7E-15 |
| Linoleic acid (%), relative to total fatty acids | 0.46 | 0.39 | 0.54 | 2E-22 | 0.45 | 0.39 | 0.53 | 1E-22  | 0.56 | 0.48 | 0.66 | 7E-13 | 0.54 | 0.46 | 0.63 | 2E-14 |
| MUFA (%), relative to total fatty acids          | 1.70 | 1.47 | 1.97 | 8E-13 | 1.72 | 1.49 | 1.99 | 2E-13  | 1.59 | 1.36 | 1.86 | 4E-9  | 1.63 | 1.40 | 1.90 | 4E-10 |
| SFA (%), relative to total fatty acids           | 1.73 | 1.50 | 1.99 | 2E-14 | 1.71 | 1.49 | 1.97 | 5E-14  | 1.45 | 1.25 | 1.68 | 1E-6  | 1.48 | 1.28 | 1.72 | 2E-7  |
| n-6 /n-3                                         | 0.80 | 0.69 | 0.92 | 0.002 | 0.79 | 0.69 | 0.91 | 0.001  | 0.91 | 0.79 | 1.06 | 0.23  | 0.90 | 0.77 | 1.04 | 0.16  |
| PUFA/SFA                                         | 0.43 | 0.37 | 0.51 | 5E-25 | 0.43 | 0.37 | 0.51 | 6E-25  | 0.56 | 0.48 | 0.65 | 6E-13 | 0.54 | 0.46 | 0.63 | 2E-14 |
| Double bonds per fatty acid                      | 0.51 | 0.44 | 0.59 | 6E-19 | 0.51 | 0.44 | 0.59 | 1E-18  | 0.59 | 0.50 | 0.69 | 3E-11 | 0.57 | 0.49 | 0.67 | 3E-12 |

**AMINO ACIDS**

|               |      |      |      |        |      |      |      |        |      |      |      |       |      |      |      |       |
|---------------|------|------|------|--------|------|------|------|--------|------|------|------|-------|------|------|------|-------|
| Isoleucine    | 1.86 | 1.58 | 2.19 | 2E-13  | 1.88 | 1.59 | 2.21 | 8E-14  | 1.67 | 1.40 | 1.99 | 8E-9  | 1.75 | 1.47 | 2.08 | 2E-10 |
| Leucine       | 2.09 | 1.76 | 2.48 | 3E-17  | 2.09 | 1.76 | 2.49 | 3E-17  | 1.75 | 1.47 | 2.10 | 6E-10 | 1.84 | 1.54 | 2.19 | 9E-12 |
| Valine        | 1.44 | 1.25 | 1.67 | 7E-7   | 1.44 | 1.25 | 1.66 | 7E-7   | 1.34 | 1.15 | 1.57 | 2E4   | 1.37 | 1.17 | 1.60 | 7E-5  |
| Phenylalanine | 1.69 | 1.46 | 1.97 | 7E-12  | 1.71 | 1.47 | 1.99 | 3E-12  | 1.17 | 1.00 | 1.37 | 0.06  | 1.23 | 1.05 | 1.44 | 0.01  |
| Tyrosine      | 1.58 | 1.37 | 1.81 | 3E-10  | 1.60 | 1.39 | 1.84 | 6E-11  | 1.26 | 1.08 | 1.47 | 0.003 | 1.29 | 1.11 | 1.51 | 0.001 |
| Alanine       | 1.61 | 1.41 | 1.84 | 2E-12  | 1.66 | 1.45 | 1.90 | 1E-13  | 1.31 | 1.14 | 1.52 | 2E-4  | 1.36 | 1.18 | 1.56 | 2E-5  |
| Glutamine     | 0.78 | 0.68 | 0.90 | 0.0007 | 0.78 | 0.68 | 0.90 | 0.0008 | 0.90 | 0.77 | 1.07 | 0.23  | 0.90 | 0.76 | 1.06 | 0.19  |
| Histidine     | 1.09 | 0.96 | 1.25 | 0.18   | 1.12 | 0.98 | 1.28 | 0.09   | 0.94 | 0.81 | 1.10 | 0.47  | 0.95 | 0.82 | 1.11 | 0.53  |
| Glycine       | 0.86 | 0.74 | 1.01 | 0.06   | 0.86 | 0.74 | 1.01 | 0.06   | 0.94 | 0.80 | 1.10 | 0.45  | 0.94 | 0.80 | 1.10 | 0.43  |

**GLYCOLYSIS-RELATED METABOLITES**

|          |      |      |      |      |      |      |      |      |      |      |      |       |      |      |      |        |
|----------|------|------|------|------|------|------|------|------|------|------|------|-------|------|------|------|--------|
| Glycerol | 1.44 | 1.23 | 1.68 | 4E-6 | 1.47 | 1.26 | 1.71 | 1E-6 | 1.24 | 1.05 | 1.47 | 0.01  | 1.25 | 1.06 | 1.48 | 0.007  |
| Glucose  | 1.29 | 1.13 | 1.47 | 2E-4 | 1.33 | 1.17 | 1.52 | 2E-5 | 1.10 | 0.96 | 1.27 | 0.18  | 1.11 | 0.97 | 1.29 | 0.13   |
| Lactate  | 1.46 | 1.27 | 1.67 | 7E-8 | 1.46 | 1.27 | 1.67 | 5E-8 | 1.06 | 0.92 | 1.22 | 0.44  | 1.06 | 0.92 | 1.23 | 0.41   |
| Pyruvate | 1.45 | 1.26 | 1.66 | 1E-7 | 1.52 | 1.32 | 1.74 | 2E-9 | 1.23 | 1.07 | 1.43 | 0.004 | 1.28 | 1.11 | 1.48 | 0.0008 |

**KETONE BODIES**

|                   |      |      |      |      |      |      |      |      |      |      |      |      |      |      |      |      |
|-------------------|------|------|------|------|------|------|------|------|------|------|------|------|------|------|------|------|
| Acetoacetate      | 0.88 | 0.76 | 1.01 | 0.07 | 0.87 | 0.76 | 1.01 | 0.07 | 1.02 | 0.88 | 1.19 | 0.75 | 1.02 | 0.88 | 1.19 | 0.77 |
| 3-hydroxybuturate | 1.00 | 0.88 | 1.15 | 0.96 | 0.97 | 0.85 | 1.11 | 0.65 | 0.93 | 0.81 | 1.08 | 0.37 | 0.97 | 0.83 | 1.12 | 0.64 |

**MISCELLANEOUS**

|                               |      |      |      |       |      |      |      |       |      |      |      |      |      |      |      |       |
|-------------------------------|------|------|------|-------|------|------|------|-------|------|------|------|------|------|------|------|-------|
| Citrate                       | 1.12 | 0.97 | 1.28 | 0.13  | 1.09 | 0.95 | 1.26 | 0.22  | 0.97 | 0.83 | 1.13 | 0.67 | 0.99 | 0.85 | 1.15 | 0.89  |
| Acetate                       | 0.68 | 0.58 | 0.80 | 2E-6  | 0.70 | 0.60 | 0.82 | 1E-5  | 0.99 | 0.86 | 1.13 | 0.85 | 0.96 | 0.84 | 1.10 | 0.59  |
| Glycoprotein acetyls          | 1.53 | 1.33 | 1.75 | 9E-10 | 1.56 | 1.36 | 1.79 | 1E-10 | 1.34 | 1.16 | 1.55 | 6E-5 | 1.42 | 1.23 | 1.64 | 1E-6  |
| C-reactive protein            | 1.38 | 1.18 | 1.62 | 6E-5  | 1.37 | 1.17 | 1.60 | 1E-4  | 1.01 | 0.86 | 1.19 | 0.91 | 1.04 | 0.89 | 1.23 | 0.62  |
| Creatinine                    | 0.91 | 0.78 | 1.06 | 0.23  | 0.89 | 0.77 | 1.04 | 0.15  | 1.07 | 0.90 | 1.27 | 0.42 | 1.04 | 0.88 | 1.23 | 0.65  |
| Albumin (signal area)         | 1.01 | 0.88 | 1.15 | 0.93  | 1.06 | 0.93 | 1.22 | 0.37  | 0.99 | 0.85 | 1.16 | 0.90 | 1.00 | 0.86 | 1.17 | 0.97  |
| Alanine aminotransferase      | 2.47 | 2.09 | 2.93 | 5E-26 | 2.49 | 2.11 | 2.95 | 1E-26 | 1.43 | 1.23 | 1.67 | 6E-6 | 1.48 | 1.27 | 1.73 | 4E-7  |
| Gamma-glutamyl transferase    | 2.07 | 1.78 | 2.42 | 2E-20 | 2.08 | 1.79 | 2.43 | 5E-21 | 1.59 | 1.35 | 1.88 | 2E-8 | 1.67 | 1.42 | 1.96 | 7E-10 |
| HOMA-insulin resistance index | 2.25 | 1.86 | 2.72 | 5E-17 | 2.26 | 1.87 | 2.72 | 2E-17 | 1.53 | 1.28 | 1.82 | 2E-6 | 1.63 | 1.37 | 1.94 | 4E-8  |

Cross-sectional associations included in 1,939–2,002 individuals of whom 339–372 had diagnosed fatty liver in 2011. Prospective associations included in 1,516–1,575 individuals with metabolite data at the 2001-baseline, of whom 263–275 had fatty liver diagnosed in 2011.

Prior to prospective analyses, individuals with suspected fatty liver in 2001 were excluded (alanine aminotransferase > 30 U/L).

P-values in the exponential format denote metabolite associations that were statistically significant associations when accounting for Bonferroni-correction ( $P < 0.0007$ ).

DHA, docosahexaenoic acid; HDL, high-density lipoprotein; HOMA-IR, homeostatic model-based insulin resistance index; IDL, intermediate-density lipoprotein; LDL, low-density lipoprotein; MUFA, monounsaturated fatty acid; PUFA, polyunsaturated fatty acid; SFA, saturated fatty acid; VLDL, very-low-density lipoprotein.

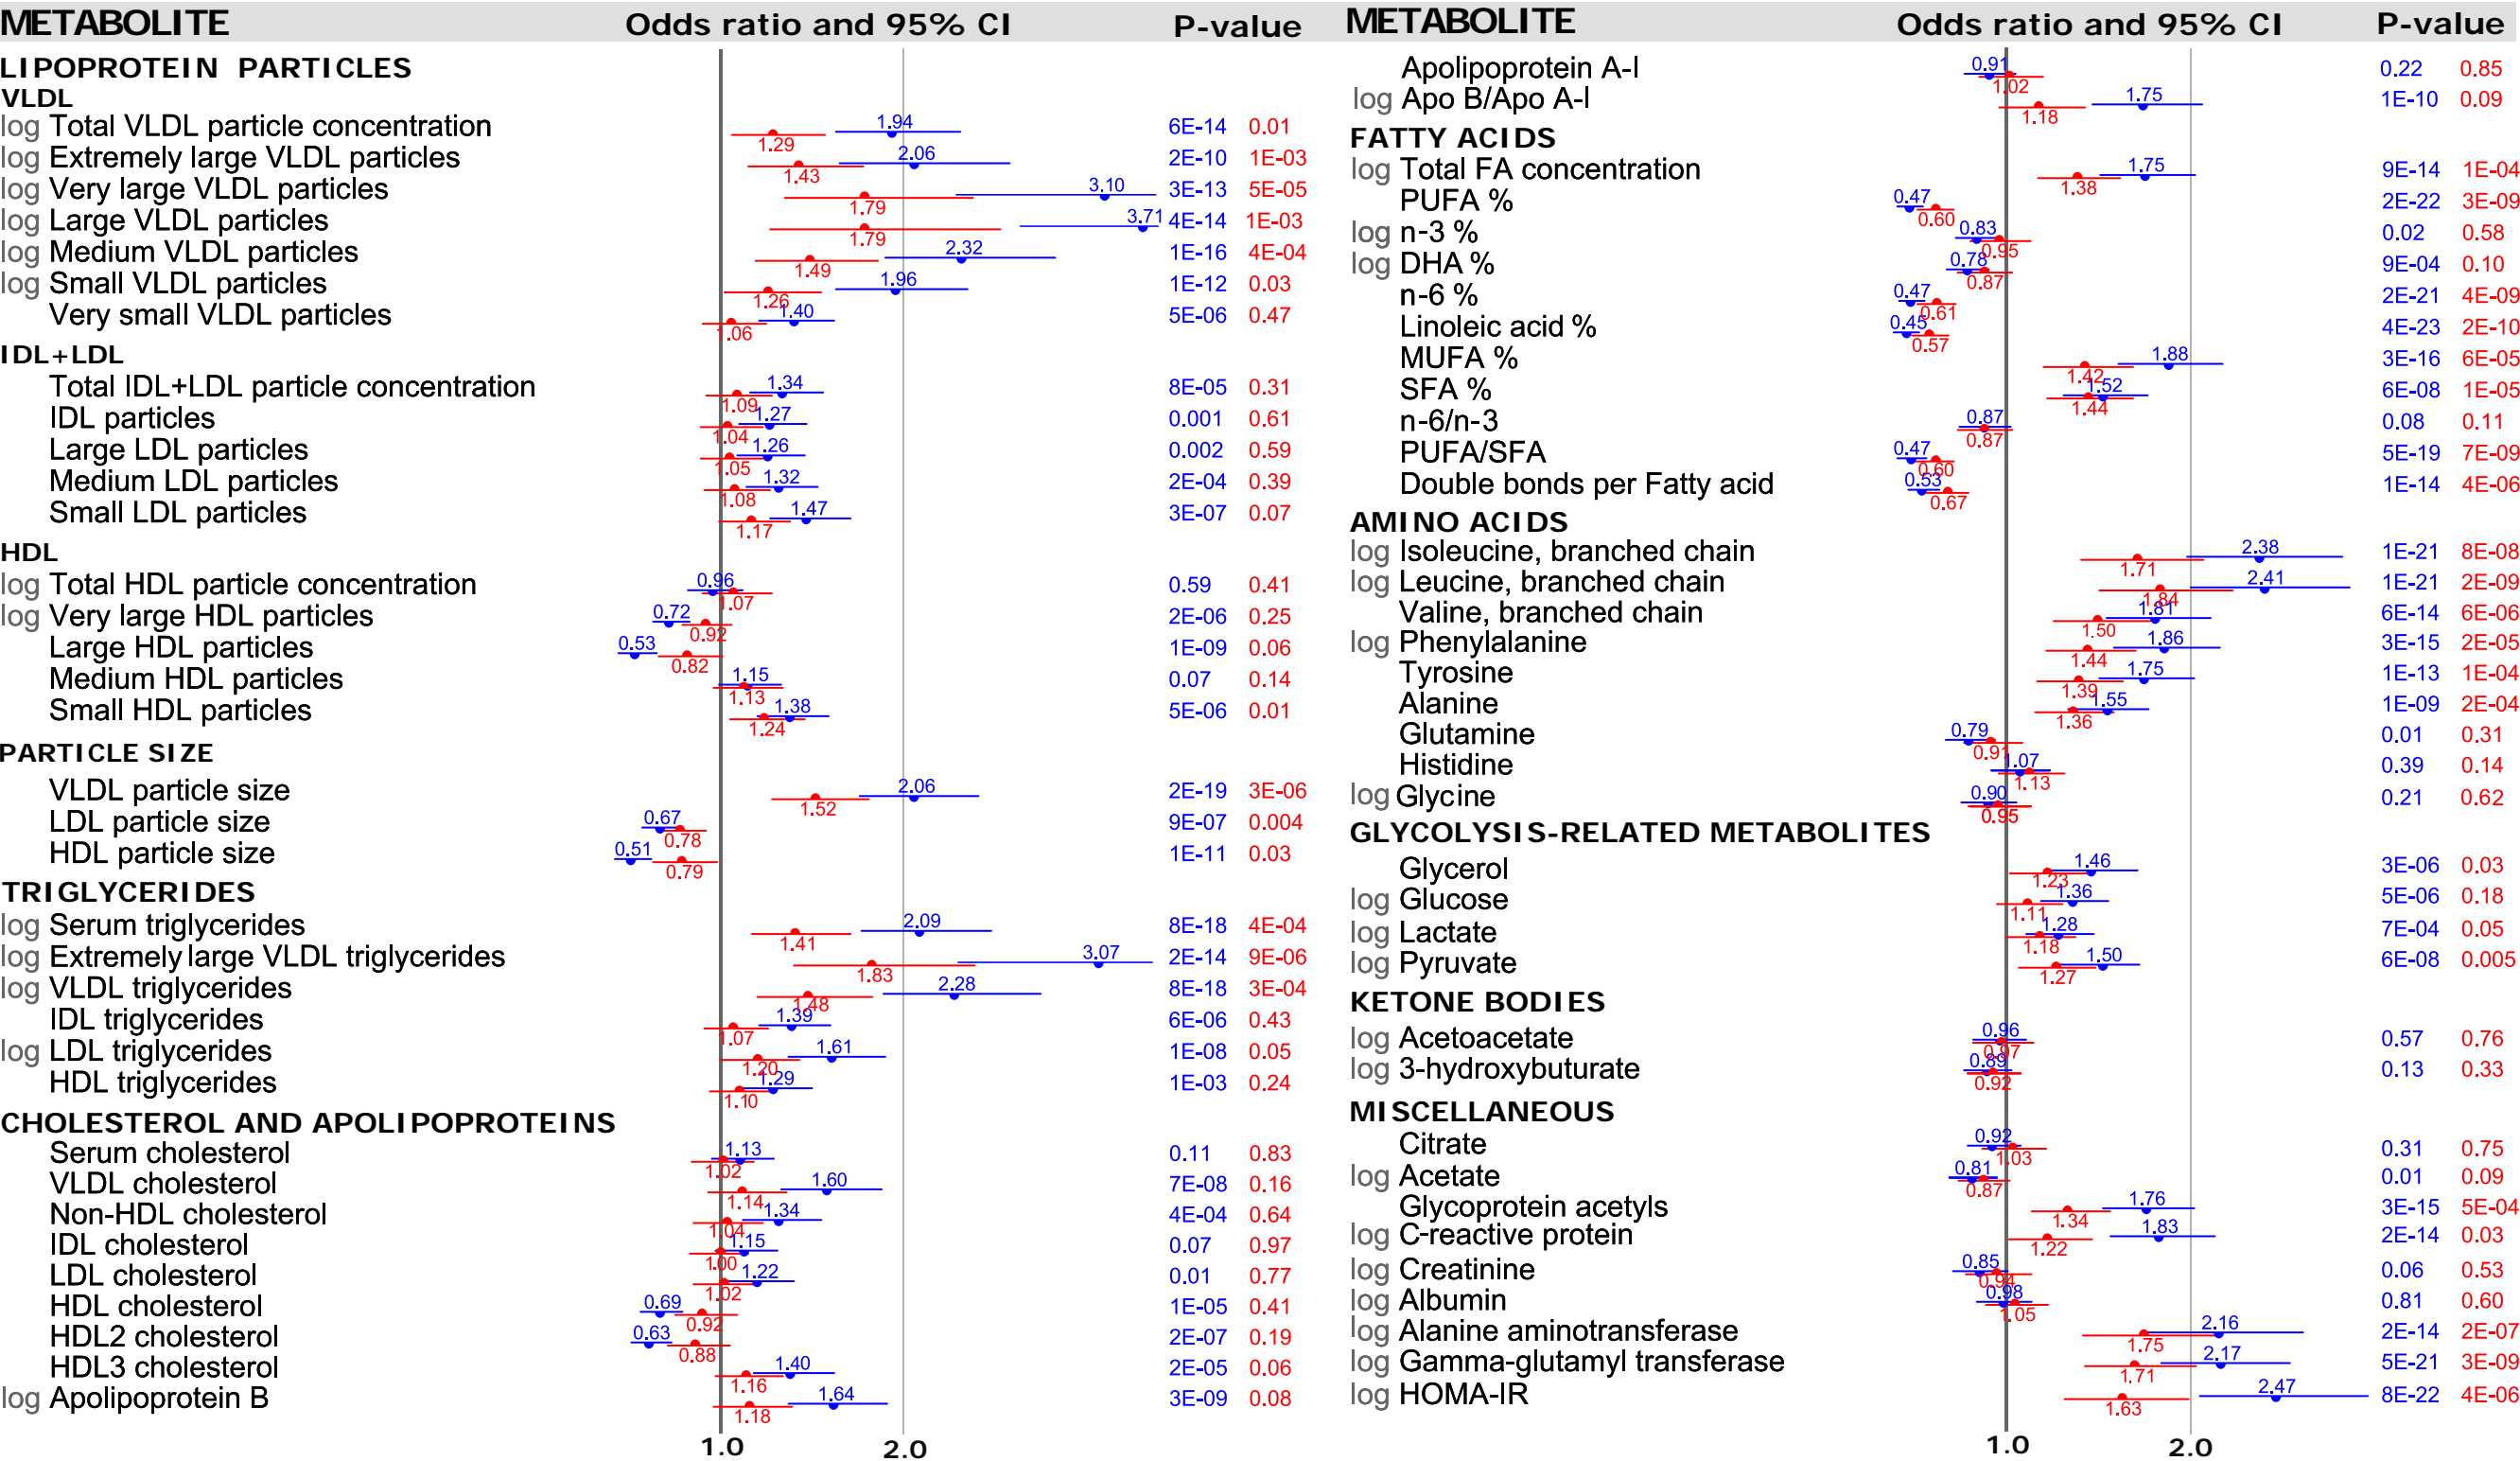

**SUPPLEMENTARY FIGURE 1:** Prospective associations of metabolic measures with 4-year risk for fatty liver (n=1,455–1,509 with metabolite data at the 2007-survey, of whom 207-212 had fatty liver diagnosed in 2011). Odds ratios (95% confidence intervals) are per 1-SD increment in the metabolic measures, and shown with adjustment for sex and age (blue), and additionally for baseline waist, alcohol intake, leisure-time physical activity and smoking (red). P-values listed in exponential format denote metabolite associations that were statistically significant associations when accounting for Bonferroni-correction ( $P < 0.0007$ ). Individuals with suspected fatty liver in 2007 (alanine aminotransferase > 30 U/L) were excluded from analyses.
